# Supplementary material for: Downregulation of X-linked inhibitor of apoptosis protein by ‘7-Benzylidenenaltrexone maleate’ sensitizes pancreatic cancer cells to TRAIL-induced apoptosis
Source: PubMed Central journal article supplement (PMC5617406; doi:10.18632/oncotarget.17841), 2017-05-12
Supplement: oncotarget-08-61057-s001.pdf [file oncotarget-08-61057-s001.pdf]

## Downregulation of X-linked inhibitor of apoptosis protein by '7-Benzylidenenaltrexone maleate' sensitizes pancreatic cancer cells to TRAIL-induced apoptosis

### SUPPLEMENTARY MATERIALS

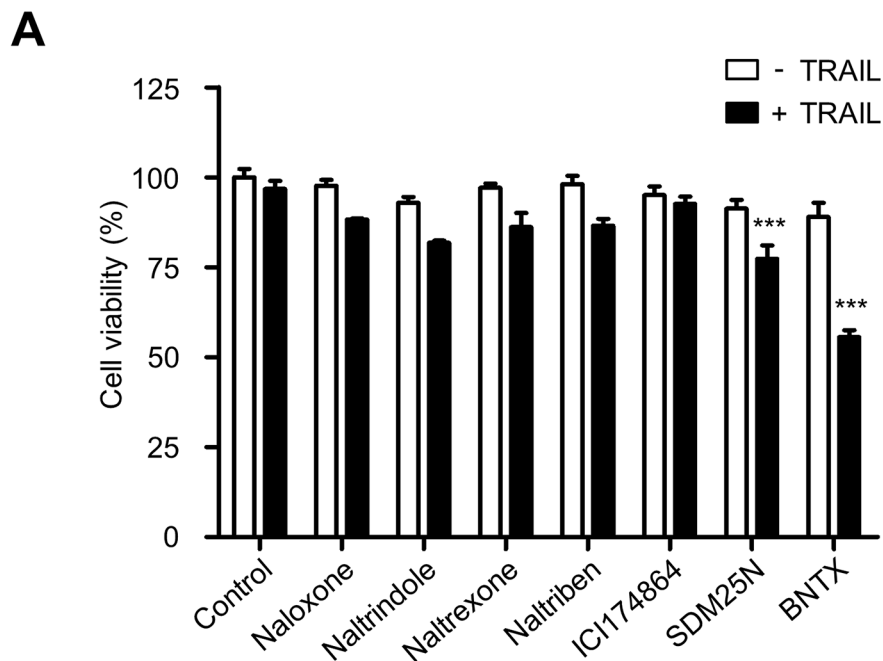

**Supplementary Figure 1: Effects of different opioid receptor antagonists on TRAIL-induced apoptosis.** (A) AsPC-1 cells were pre-treated with various antagonists (5  $\mu$ M) for 0.5 h and then exposed to TRAIL (25 ng/ml) for 24 h. Cell viability was measured by a luminescent CellTiter-Glo assay. Asterisks indicate significant differences compared with the control (\*\*\*)  $P < 0.001$ .

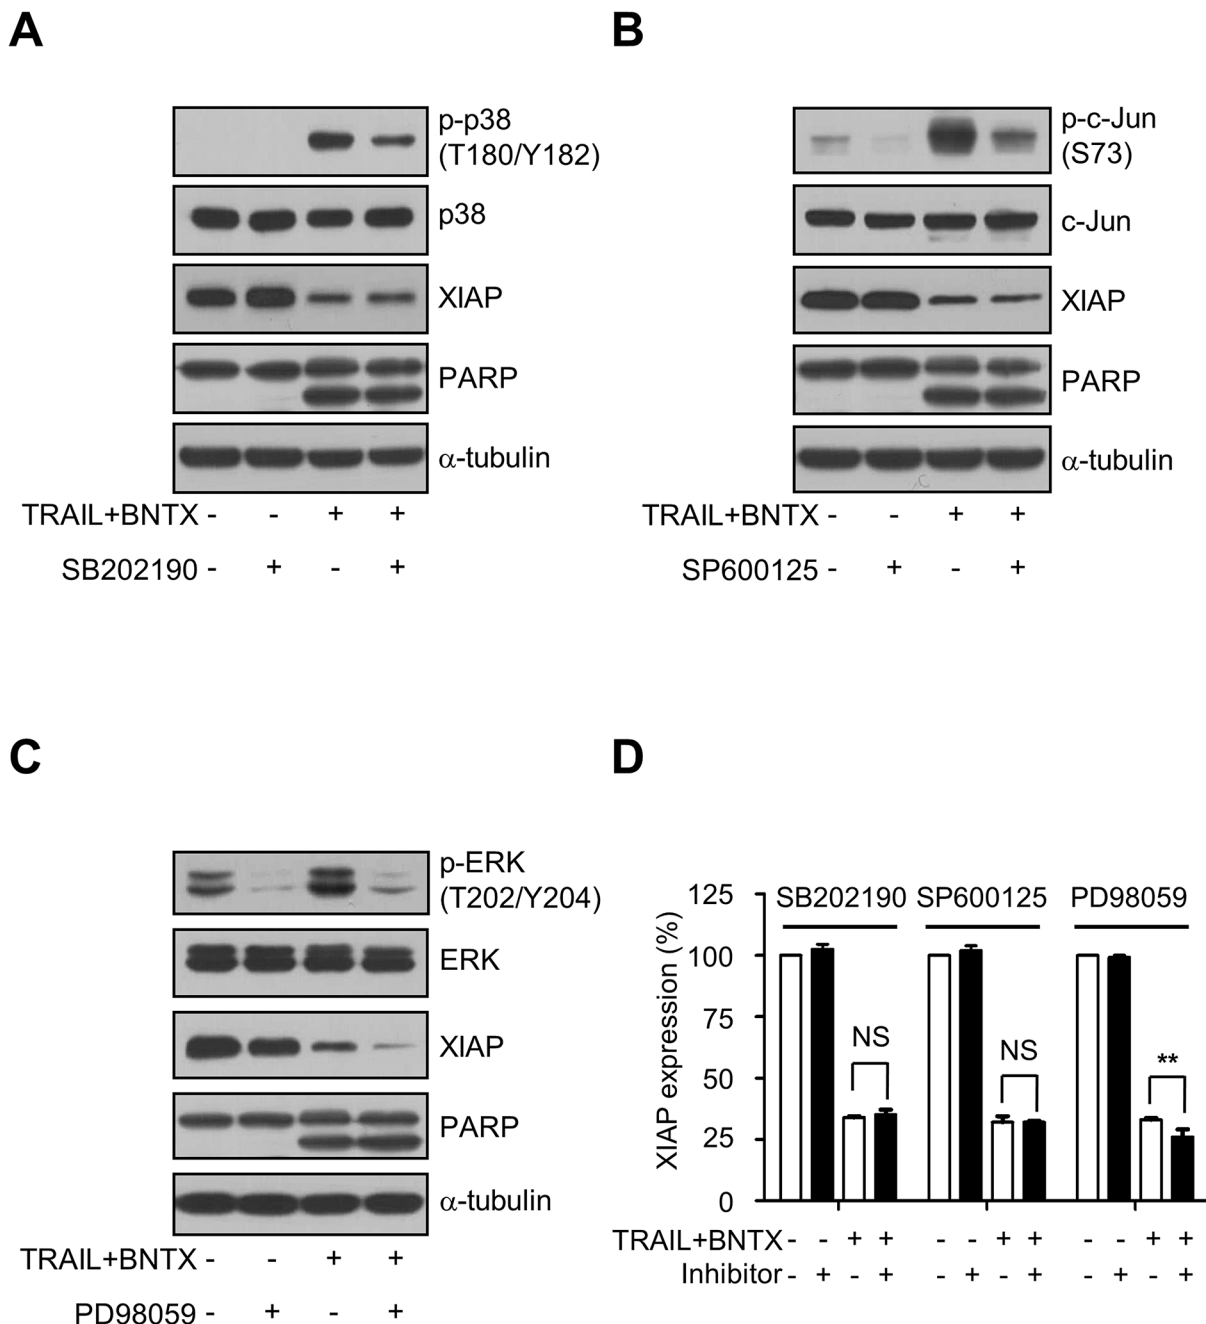

**Supplementary Figure 2: Effects of inhibitors of p38, c-Jun, and ERK on the combination of BNTX and TRAIL in AsPC-1 cells.** (A, B, C) AsPC-1 cells were pre-treated with inhibitors (10 μM) for 0.5 h and followed by combined treatment of BNTX (2.5 μM) with TRAIL (25 ng/ml) for additional 24 h. Cell lysates were analyzed by western blot analysis using the indicated antibodies. D. Histograms represent mean ± SD of XIAP densities. Asterisks indicate significant differences compared with the control (\*\* *P* < 0.01). NS, not significant.

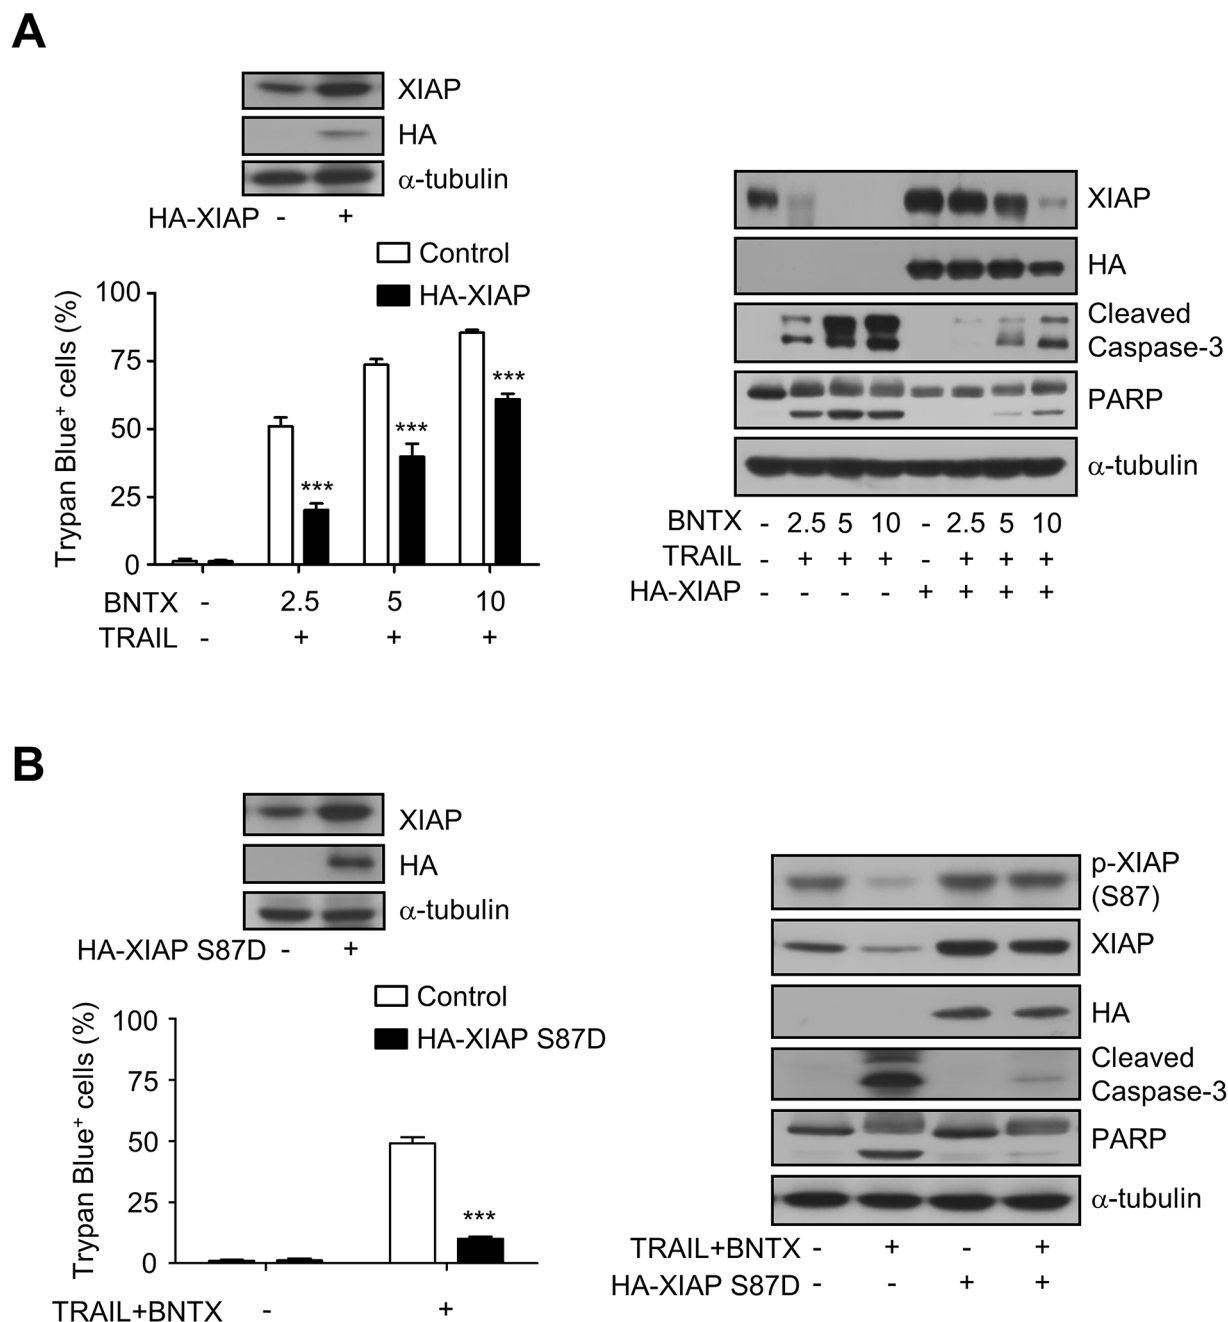

**Supplementary Figure 3: Effects of transient expression of XIAP on the combination of BNTX and TRAIL in AsPC-1 cells.** (A) AsPC-1 cells were transfected with empty vector or HA-XIAP WT for 48 h and then incubated with BNTX (2.5  $\mu$ M) and TRAIL (25 ng/ml) for 24 h. Cell lysates were analyzed by western blot analysis using the indicated antibodies. The percentage of cell death was evaluated by trypan blue exclusion. Values are the mean  $\pm$  SD from two independent experiments performed in duplicate. Asterisks indicate significant differences compared with the control (\*\*\*)  $P < 0.001$ . (B) AsPC-1 cells were transfected with empty vector or HA-XIAP S87D for 48 h and then incubated with BNTX (2.5  $\mu$ M) and TRAIL (25 ng/ml) for 24 h. Cell lysates were analyzed by western blot analysis using the indicated antibodies. The percentage of cell death was evaluated by trypan blue exclusion. Values are the mean  $\pm$  SD from two independent experiments performed in duplicate. Asterisks indicate significant differences compared with the control (\*\*\*)  $P < 0.001$ .
